# Supplementary material for: Stable Li metal anode in a lithiophilic shuttle
Source: Royal Society of Chemistry journal article supplement (doi:10.1039/d1nr08194b), 2022-01-01
Supplement: d1nr08194b1.pdf [file d1nr08194b1.pdf]

## Supporting Information

### Stable Li metal anode in a lithiophilic shuttle

*Kailin Luo,<sup>1,a</sup> Ziyu Leng,<sup>1,b</sup> Zhendong Li,<sup>a</sup> Jiahe Chen,<sup>a,d</sup> Nannan Sun,<sup>a,d</sup> Jinting Xu,<sup>a</sup> Xiaoling Cao<sup>\*b</sup> and Zhe Peng<sup>\*a,c,d</sup>*

a. Ningbo Institute of Materials Technology and Engineering, Chinese Academy of Sciences, Ningbo 315201, China.

b. School of Mechanical Engineering, Southwest Jiaotong University, Chengdu 610031, China.

c. 21C Innovation Laboratory, Contemporary Amperex Technology Ltd. (CATL), Ningde 352100, China.

d. Center of Materials Science and Optoelectronics Engineering, University of Chinese Academy of Sciences, Beijing 100049, China.

1 These authors contribute equally to this work

#### **Corresponding Author**

\*E-mail: xlcao@swjtu.edu.cn; pengzhe@nimte.ac.cn

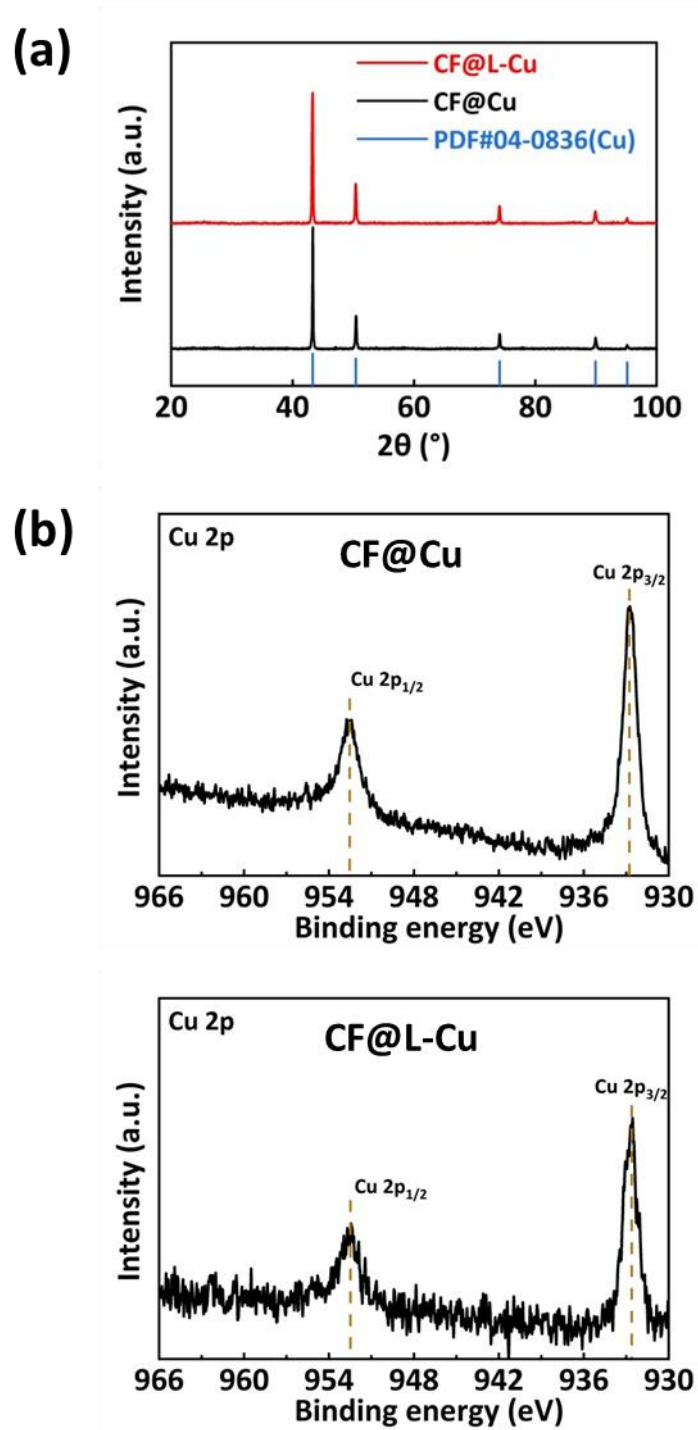

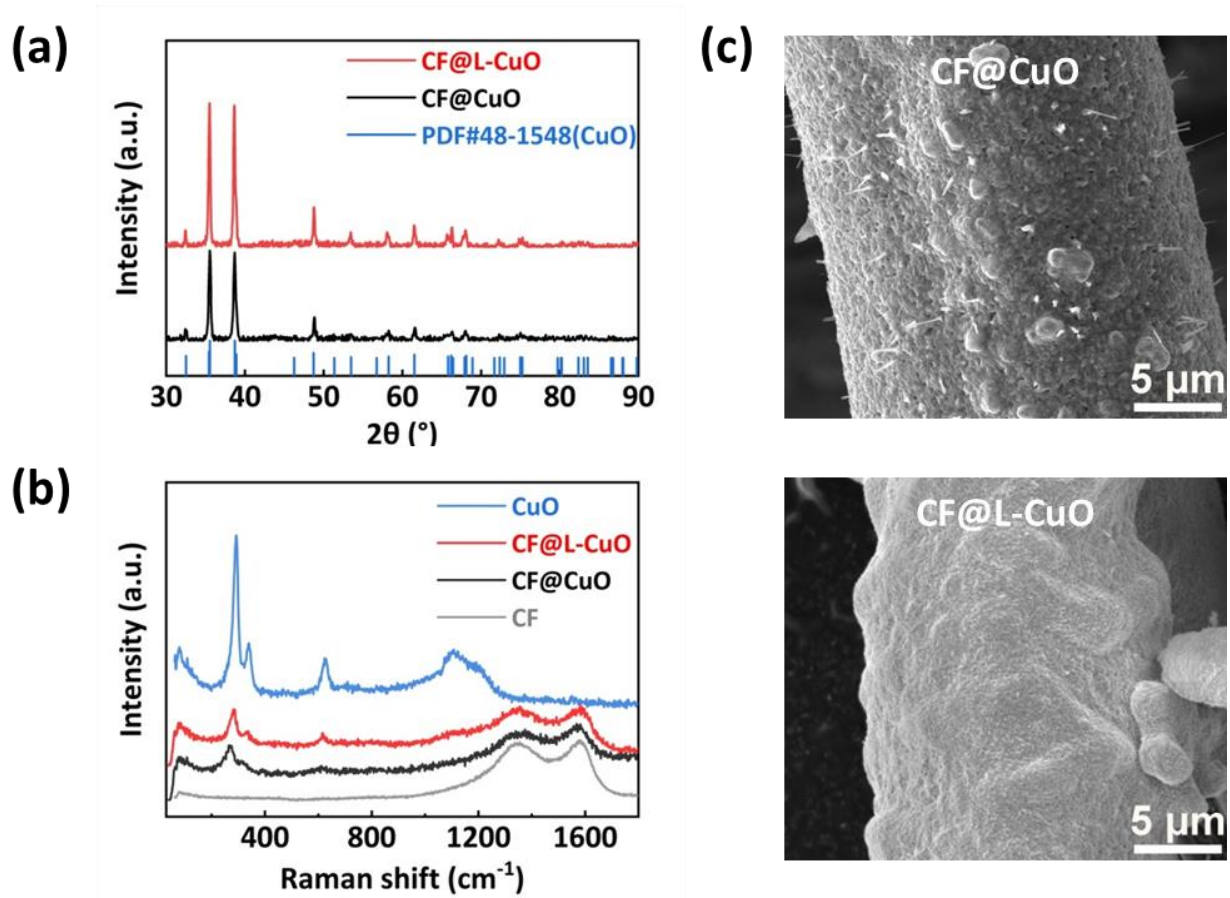

**Figure S2.** (a) XRD patterns, (b) Raman spectra and (c) SEM images of CF@CuO and CF@L-CuO.

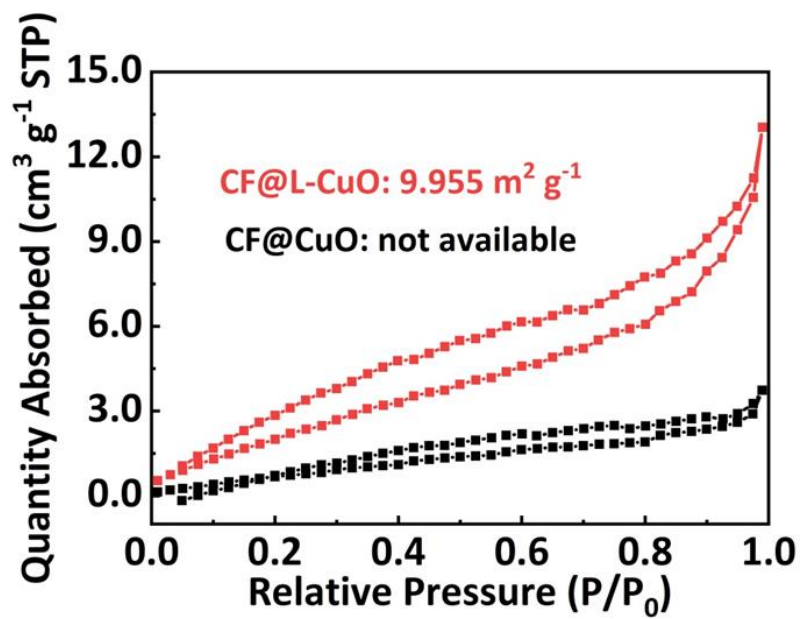

**Figure S3.** N<sub>2</sub> adsorption isotherm of CF@CuO and CF@L-CuO from BET measurements.

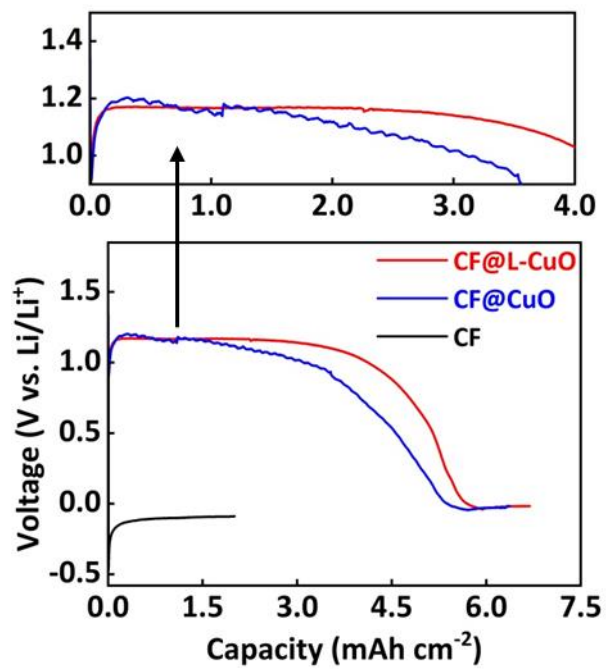

**Figure S4.** Voltage profiles of Li plating on CF, CF@CuO and CF@L-CuO.

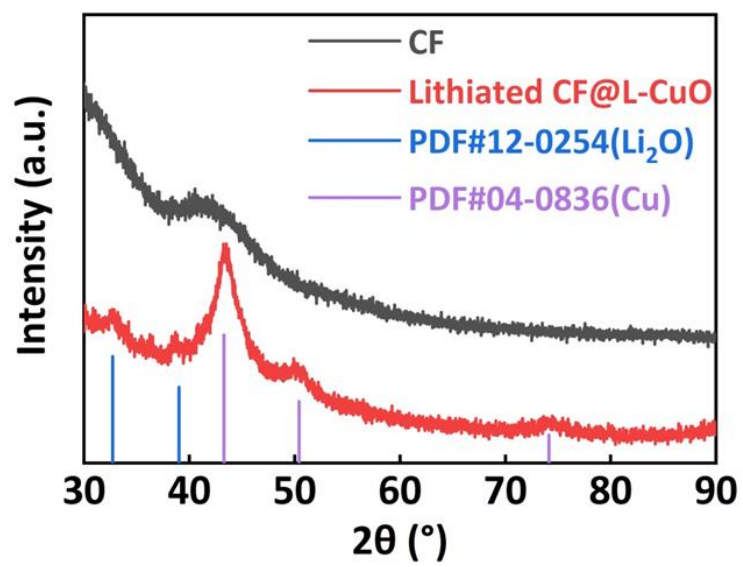

Figure S5. XRD pattern of the lithiated CF@L-CuO.

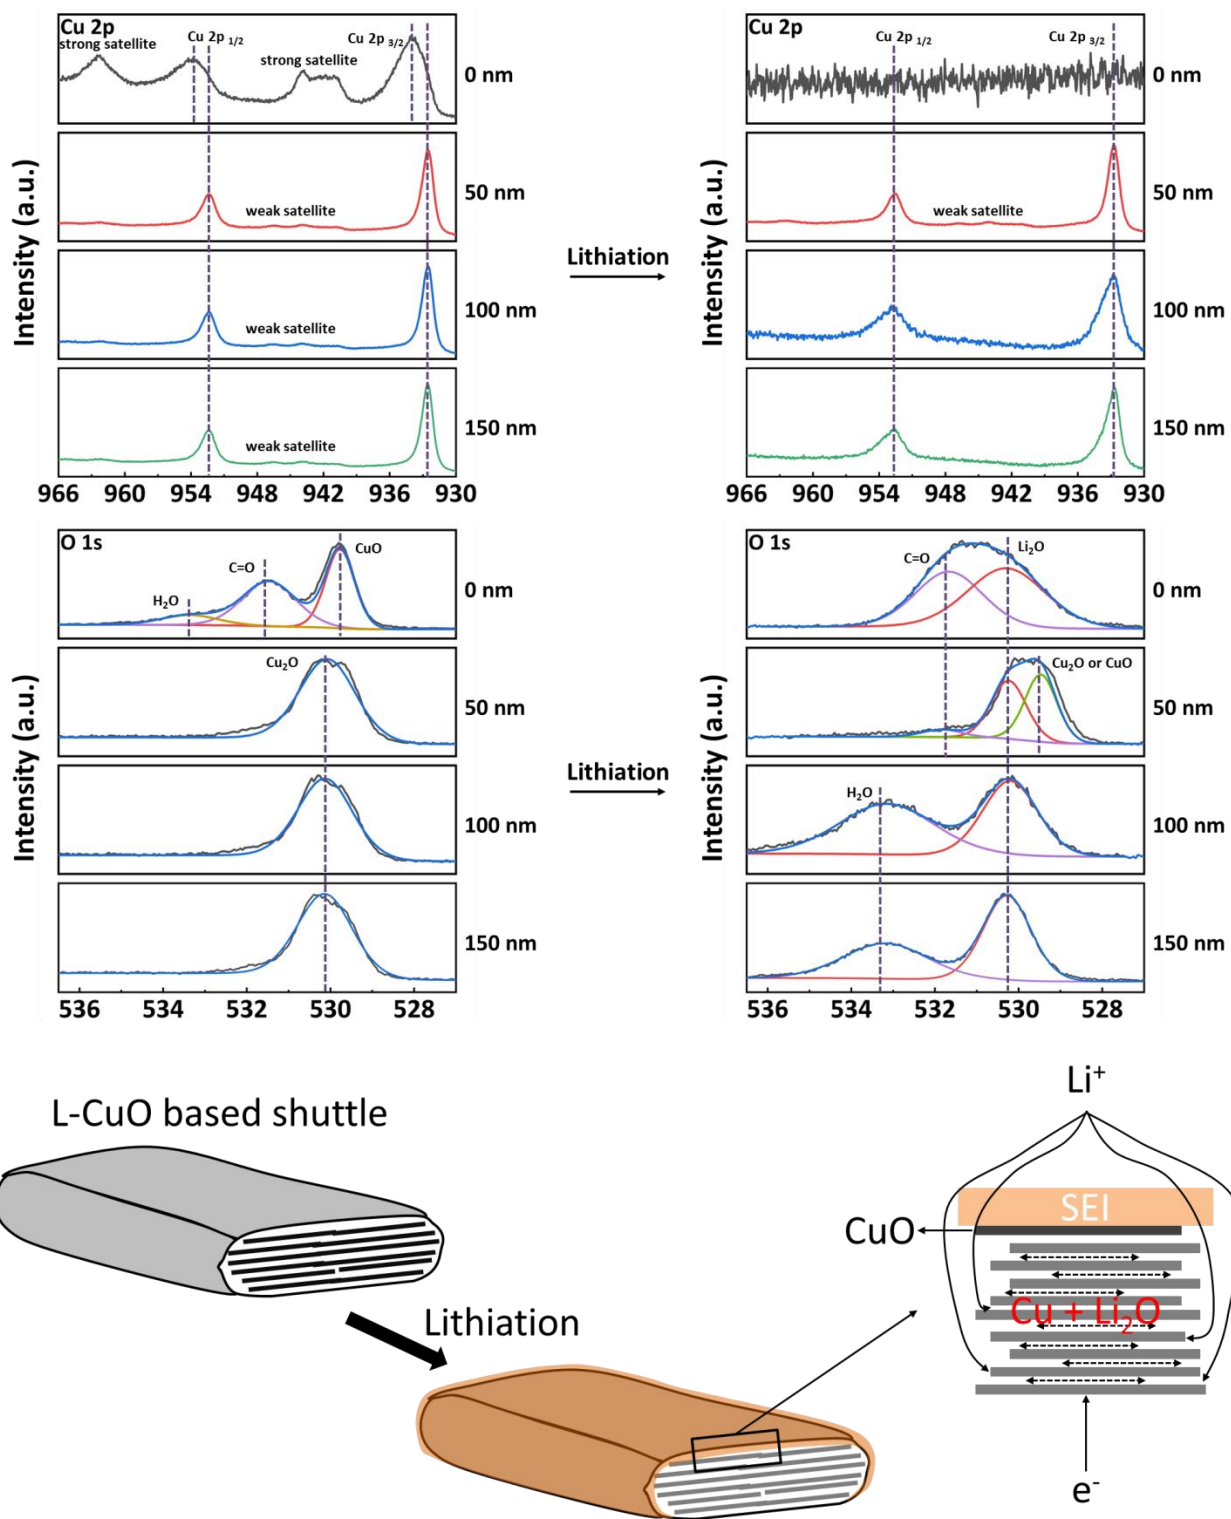

**Figure S6.** Cu 2p and O 1s XPS spectra of CF@L-CuO before and after lithiation process.

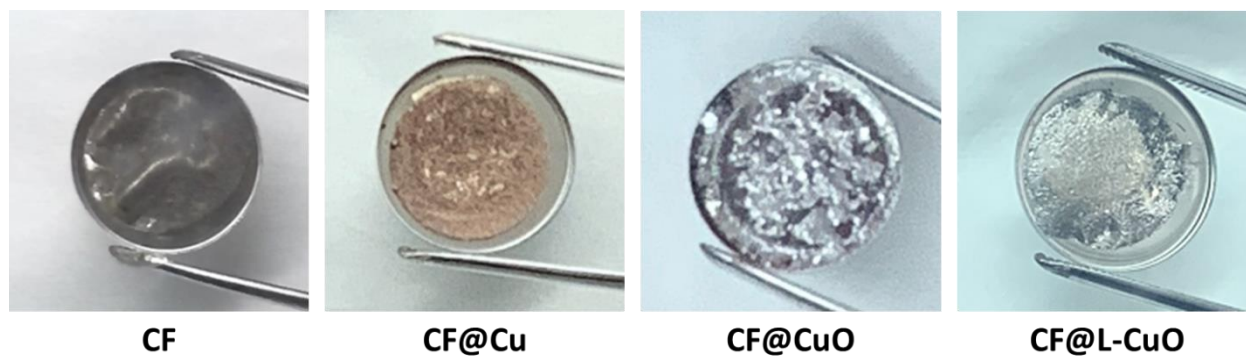

**Figure S7.** Digital photos of CF, CF@Cu, CF@CuO and CF@L-CuO deposited on molten Li.



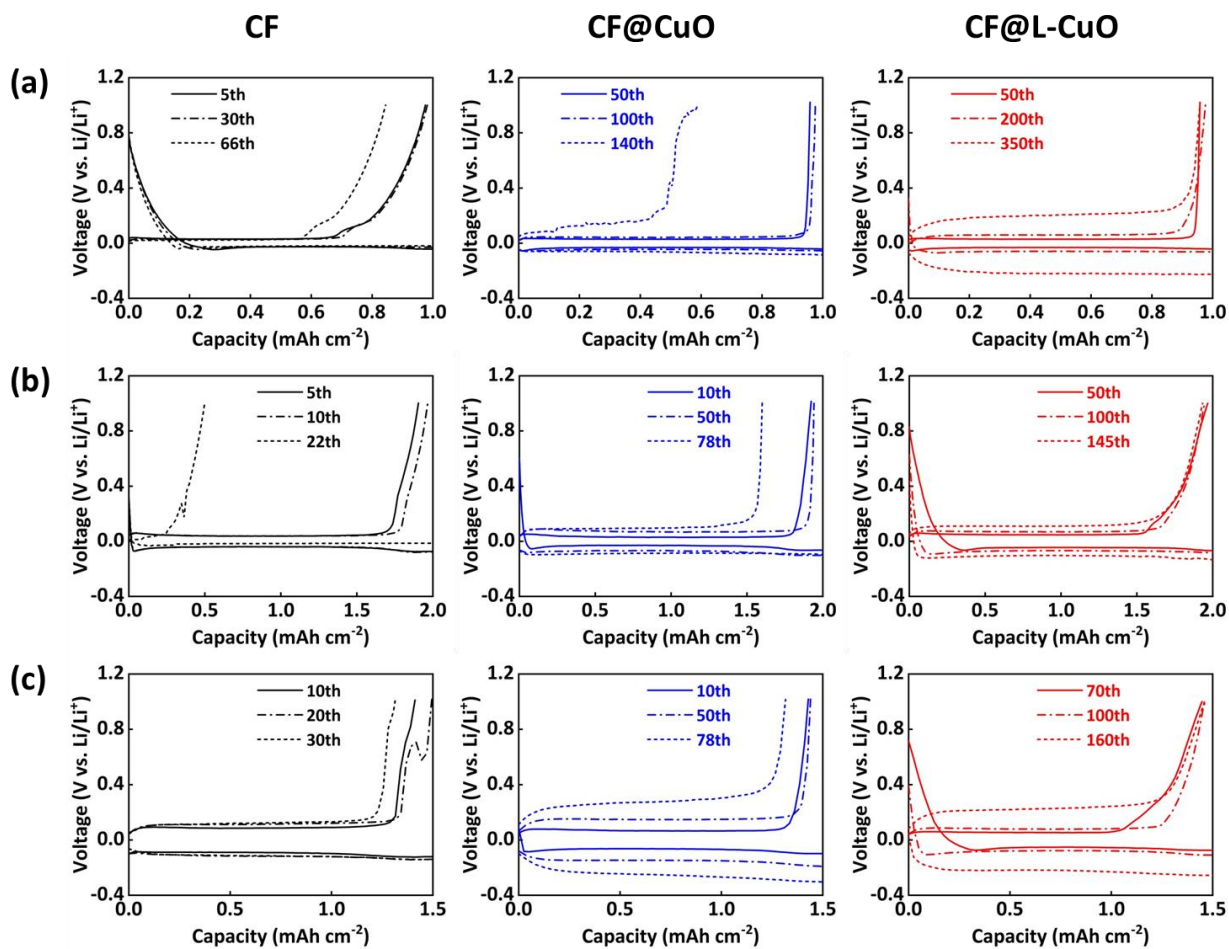

**Figure S8.** Discharge/charge curves of Li plating/stripping of Li metal half cells using CF, CF@CuO or CF@L-CuO as working electrodes, under (a)  $0.5 \text{ mA cm}^{-2} - 1 \text{ mAh cm}^{-2}$ , (b)  $1 \text{ mA cm}^{-2} - 2 \text{ mAh cm}^{-2}$  and (c)  $3 \text{ mA cm}^{-2} - 1.5 \text{ mAh cm}^{-2}$ .

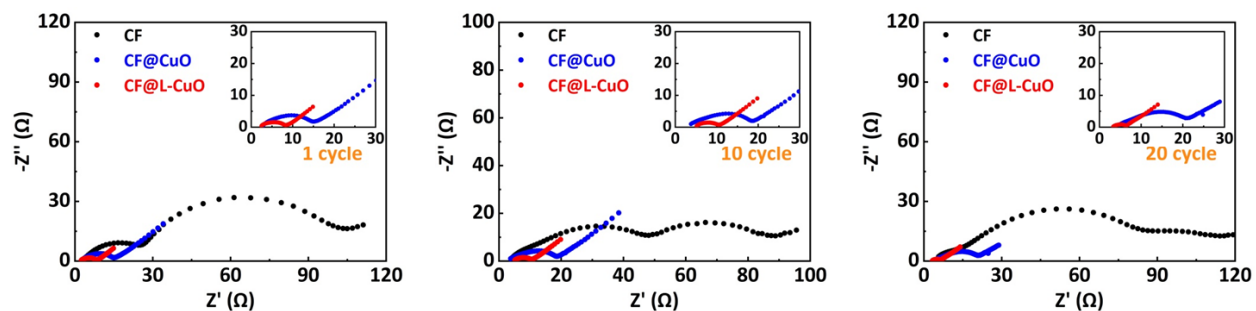

**Figure S9.** Nyquist plots from EIS data of CF, CF@CuO and CF@L-CuO at different cycling states. The cycling was carried out under  $0.5 \text{ mA cm}^{-2} - 1 \text{ mAh cm}^{-2}$ .

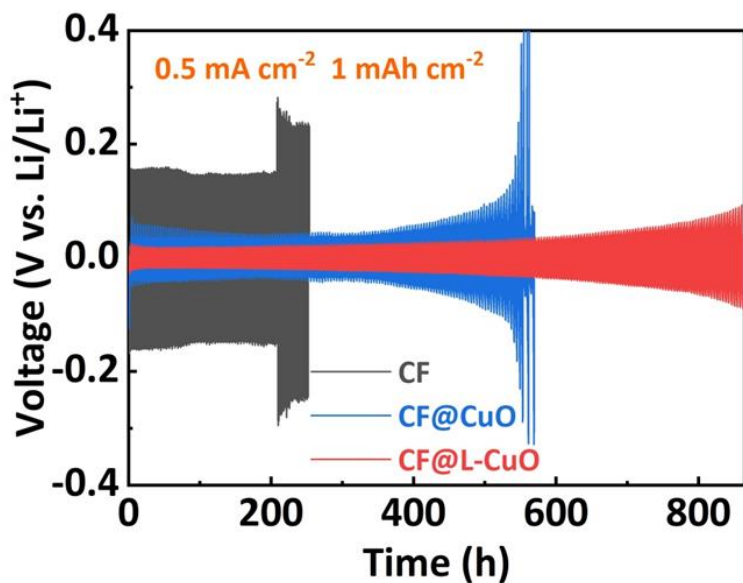

**Figure S10.** Voltage profiles of Li/CF||Li/CF, Li/CF@CuO||Li/CF@CuO and Li/CF@L-CuO||Li/CF@L-CuO symmetrical cells cycling at  $0.5 \text{ mA cm}^{-2}$  for a fixed capacity of  $1 \text{ mAh cm}^{-2}$ .

2.

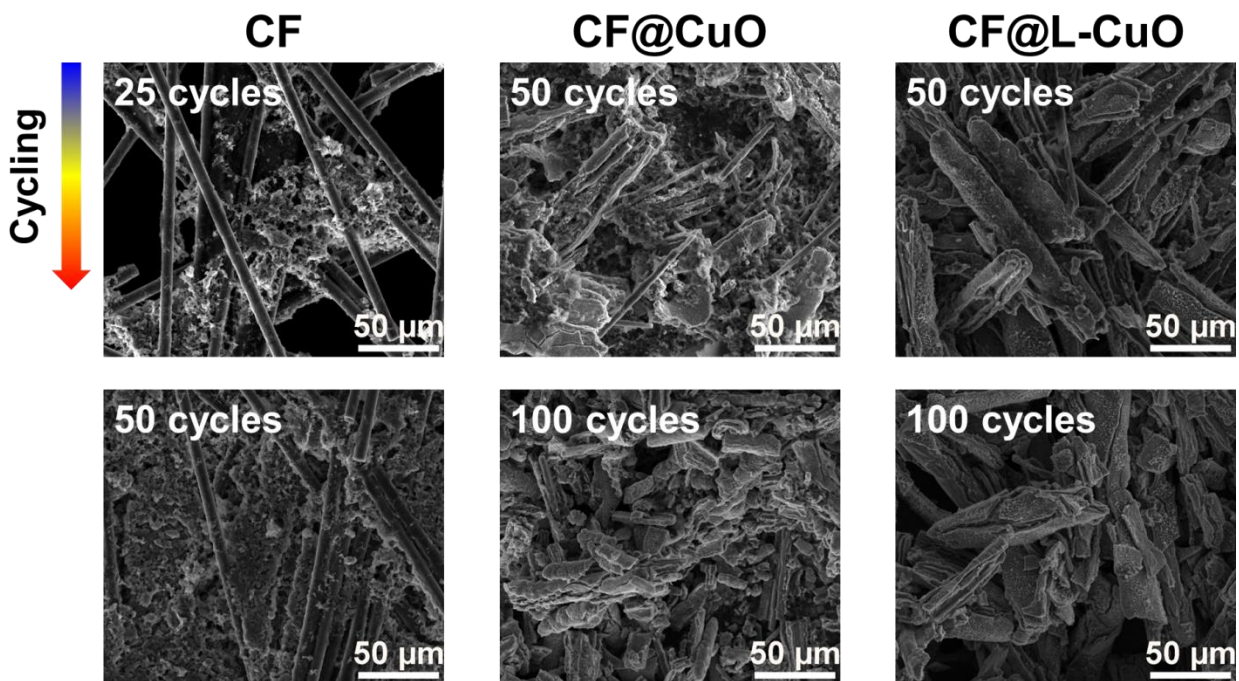

**Figure S11.** SEM images of CF, CF@CuO and CF@L-CuO disassembled from the half cells at different cycling states. The cycling was carried out under  $0.5 \text{ mA cm}^{-2} - 1 \text{ mAh cm}^{-2}$ .

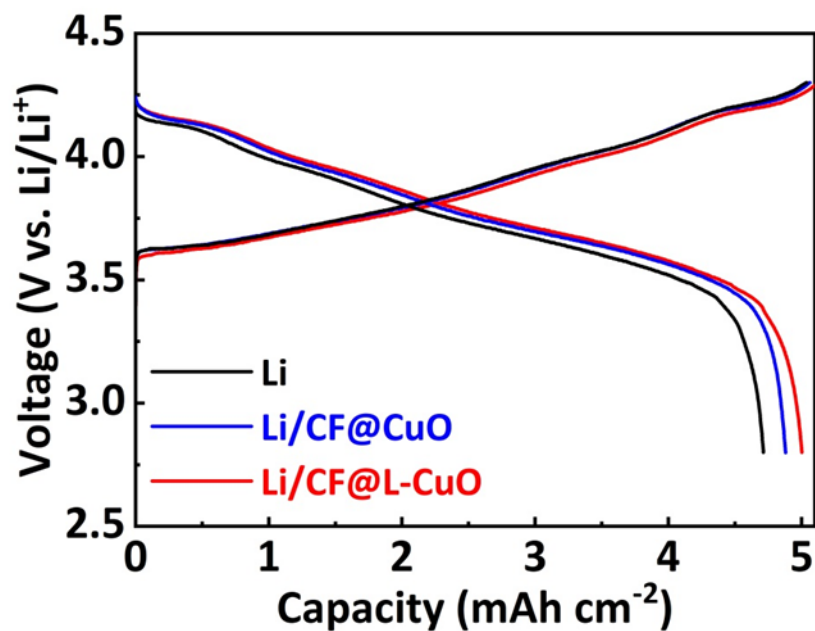

**Figure S12.** Charge/discharge curves of Li metal full cells using Li, Li/CF@CuO or Li/CF@L-CuO anodes and NCA cathodes ( $\sim 5 \text{ mAh cm}^{-2}$ ), at charge/discharge rates of 0.1C/0.1C ( $0.5 \text{ mA cm}^{-2}/0.5 \text{ mA cm}^{-2}$ ).

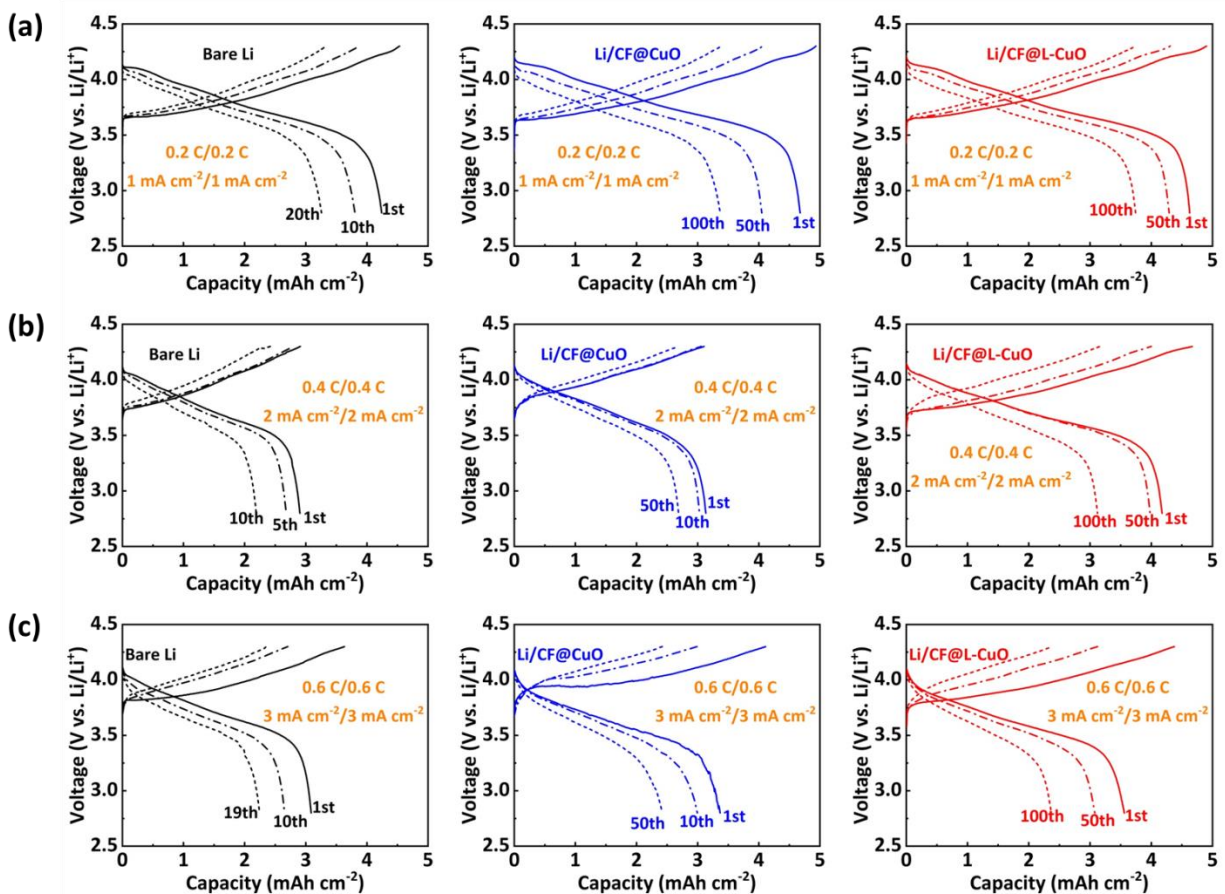

**Figure S13.** Charge/discharge curves of Li metal full cells using Li, Li/CF@CuO or Li/CF@L-CuO anodes and NCA cathodes ( $\sim 5 \text{ mAh cm}^{-2}$ ), at charge/discharge rates of (a) 0.2C/0.2C ( $1 \text{ mA cm}^{-2}/1 \text{ mA cm}^{-2}$ ), (b) 0.4C/0.4C ( $2 \text{ mA cm}^{-2}/2 \text{ mA cm}^{-2}$ ) and (c) 0.6C/0.6C ( $3 \text{ mA cm}^{-2}/3 \text{ mA cm}^{-2}$ ).

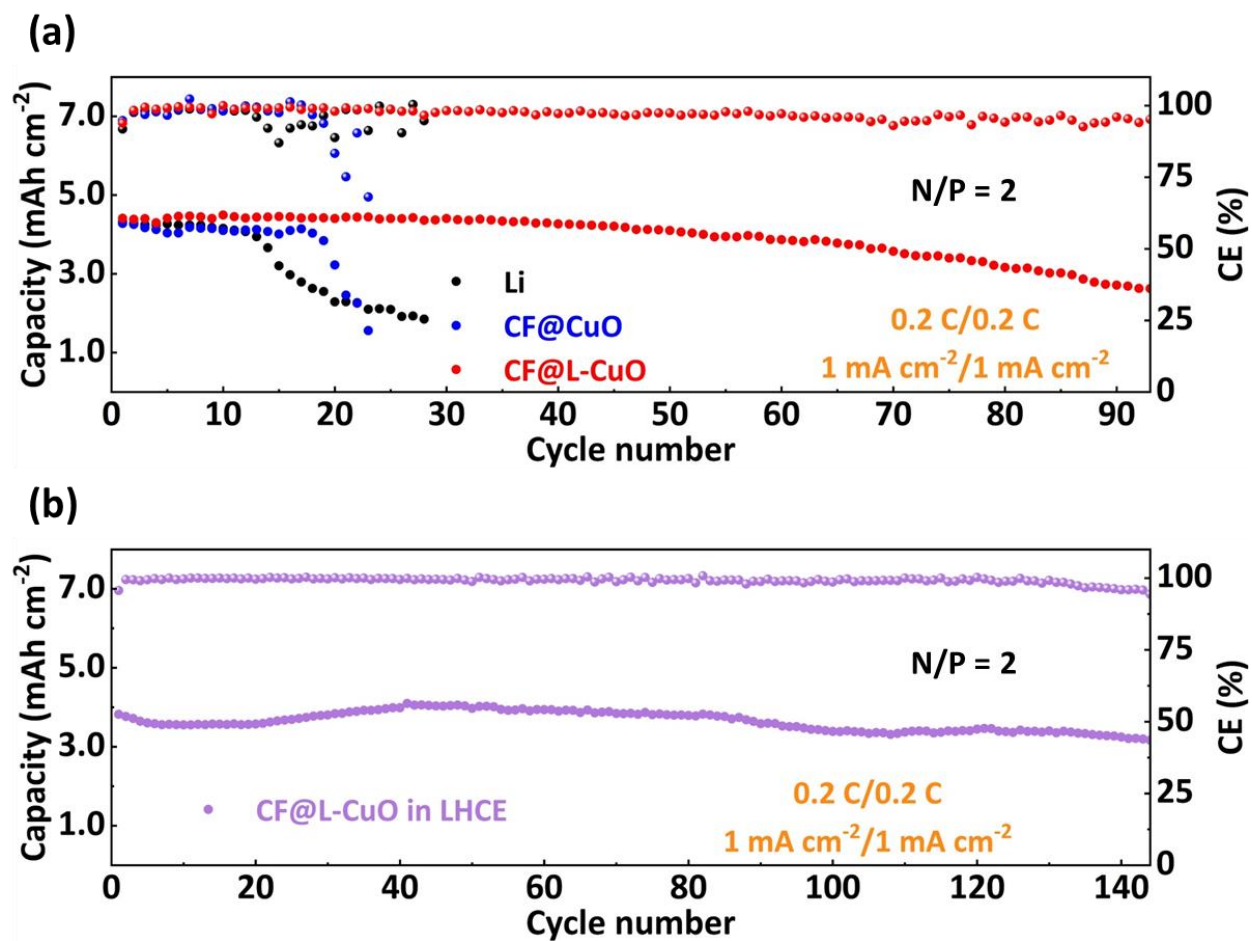

**Figure S14.** Cycling performances of Li metal full cells using NCA cathodes ( $\sim 5 \text{ mAh cm}^{-2}$ ) with an N/P ratio of 2, in (a) carbonate electrolyte and (b) LHCE. The cycling test was carried out at charge/discharge rates of 0.2C/0.2C ( $1 \text{ mA cm}^{-2}/1 \text{ mA cm}^{-2}$ ).
